# Supplementary material for: Biomarker identification of isolated compartments of the cell wall, cytoplasm and vacuole from the internodal cell of characean Nitellopsis obtusa
Source: PeerJ. 2021 Feb 17;9:e10930. doi: 10.7717/peerj.10930 (PMC7896509; doi:10.7717/peerj.10930)
Supplement: Supplemental Information 1 — Raw data of enzymatic biomarker activities and Cu measurements in isolated cell fractions. [file peerj-09-10930-s001.xlsx]

## Sheet: Sheet1
	Fraction	Abbreviation	α-Manosidase	Malate Dehydrogenase
			µmol/min/mg protein	pmol/min/mg protein
14-06-2017	vacuolar	Vac	300.2	0.69
23-10-2017	vacuolar	Vac	180.4	1.32
08-11-2017	vacuolar	Vac	352.8	0.5
14-06-2017	cytoplasm-vacuolar mix	Cyt-Vac mix (supernatant)	43.7	176.31
23-10-2017	cytoplasm-vacuolar mix	Cyt-Vac mix (supernatant)	23.1	176.78
08-11-2017	cytoplasm-vacuolar mix	Cyt-Vac mix (supernatant)	43.9	136.38
14-06-2017	cytoplasm-vacuolar mix	Cyt-Vac mix (residue)	140.9	1.12
23-10-2017	cytoplasm-vacuolar mix	Cyt-Vac mix (residue)	96.3	1.92
08-11-2017	cytoplasm-vacuolar mix	Cyt-Vac mix (residue)	156.1	0.9
14-06-2017	cell wall	CW	25.3	6.06
23-10-2017	cell wall	CW	14.4	2.22
08-11-2017	cell wall	CW	62.7	1.31
14-06-2017	cell wall tube		23.4
23-10-2017	cell wall tube		15.7
08-11-2017	cell wall tube		42.1
14-06-2017	node		52.4
23-10-2017	node		22.3
08-11-2017	node		65.6
14-06-2017	total intracellular content			11.36
23-10-2017	total intracellular content			6.81
08-11-2017	total intracellular content			7.33
Cu concentrations in the compartments of the cells exposed to 100 mg/L nCuO
		3 h [Manusadžianas et al., 2017]		30 min [present study]
	Cell wall, Cu mg/g	1.04946		0.326842
		1.11407		1.46417
		1.48145		1.0029
	vacuole, Cu mg/L	0.16		0.048
		0.0906667		0.148
		0.11		0.217778
	Cyt Vac mix supernatant, Cu mg/L	0.165		0.12
		0.181333		0.111111
		0.305882		0.208889
	Cyt Vac mix residue, Cu mg/L	2.08		2
		0.68		3.28
		0.96		1.44
